# Supplementary material for: A Novel Insight into the Immune-Related Interaction of Inflammatory Cytokines in Benign Prostatic Hyperplasia
Source: MDPI journal article supplement (doi:10.3390/jcm12051821), 2023-02-24
Supplement: s1 [file s1]

**Table S1.** Phytotherapeutics for the treatment of benign prostatic hyperplasia and their mechanism of action.

| Plant Species                        | Postulated mechanism of action                                                                                                                                                                                                                                                                                                                                                                                         | References |
|--------------------------------------|------------------------------------------------------------------------------------------------------------------------------------------------------------------------------------------------------------------------------------------------------------------------------------------------------------------------------------------------------------------------------------------------------------------------|------------|
| <i>Serenoa repens</i> (saw palmetto) | <ul style="list-style-type: none"> <li>• 5<math>\alpha</math>-reductase inhibition</li> <li>• decrease of DHT level (Inhibiting its binding to androgen receptors)</li> <li>• inhibits DHT and some testosterone metabolites formation</li> <li>• anti-inflammatory activity</li> <li>• anti-proliferative activity</li> <li>• spasmolytic effects</li> <li>• <math>\alpha</math>1-adrenoceptors antagonism</li> </ul> | [1,2]      |
| <i>Cucurbita pepo</i>                | <ul style="list-style-type: none"> <li>• Decrease of DHT level (Inhibiting its binding to androgen receptors)</li> <li>• 5<math>\alpha</math>-reductase inhibition</li> <li>• Inhibition of testosterone-induced hypertrophy</li> </ul>                                                                                                                                                                                | [3,4]      |
| <i>Prunus africana</i>               | <ul style="list-style-type: none"> <li>• Anti-inflammatory activity</li> <li>• anti-proliferative activity</li> <li>• pro-apoptotic activity</li> <li>• Inhibition of estrogen receptors, progesterone and androgen receptors.</li> </ul>                                                                                                                                                                              | [5–7]      |
| <i>Urtica dioica</i>                 | <ul style="list-style-type: none"> <li>• Anti-proliferative activity</li> <li>• anti-inflammatory activity</li> <li>• Inhibits TNF activity</li> <li>• Inhibits the connecting of SGBG</li> <li>• Stimulates T-lymphocytes activity and the complement activation</li> </ul>                                                                                                                                           | [8–11]     |
| <i>Secale cereale</i>                | <ul style="list-style-type: none"> <li>• Anti-inflammatory activity-decreased IL-6 and TNF-<math>\alpha</math> cytokines levels</li> <li>• pro-apoptotic activity</li> <li>• <math>\alpha</math>-adrenergic receptors block</li> <li>• spasmolytic activity</li> <li>• 5<math>\alpha</math>-reductase inhibition</li> <li>• Decreased PSA expression and androgen receptor</li> </ul>                                  | [12–14]    |

DHT = dihydrotestosterone; TNF = tumor necrosis factor; SGBG = sex hormone binding globulin; IL = interleukin; PSA = prostate-specific antigen

#### References

1. Gravas, S.; Samarinas, M.; Zacharouli, K.; Karatzas, A.; Tzortzis, V.; Koukoulis, G.; Melekos, M. The effect of hexanic extract of *Serenoa repens* on prostatic inflammation: results from a randomized biopsy study. *World J Urol* 2019, 37, 539-544, doi: 10.1007/s00345-018-2409-1.
2. Ishii, I.; Wada, T.; Takara, T. Effects of saw palmetto fruit extract intake on improving urination issues in Japanese men: A randomized, double-blind, parallel-group, placebo-controlled study. *Food Sci Nutr* 2020, 8, 4017-4026, doi: 10.1002/fsn3.1654.
3. Tsai, Y.S.; Tong, Y.C.; Cheng, J.T.; Lee, C.H.; Yang, F.S.; Lee, H.Y. Pumpkin seed oil and phytosterol-F can block testosterone/prazosin-induced prostate growth in rats. *Urol Int* 2006, 77, 269-74, doi: 10.1159/000094821.

4. Gossell-Williams, M.; Davis, A.; O'Connor, N. Inhibition of testosterone-induced hyperplasia of the prostate of sprague-dawley rats by pumpkin seed oil. *J Med Food* 2006, 9, 284-6, doi: 10.1089/jmf.2006.9.284.
5. Paubert-Braquet, M.; Cave, A.; Hocquemiller, R.; Delacroix, D.; Dupont, C.; Hedef, N.; Borgeat, P. Effect of *Pygeum africanum* extract on A23187-stimulated production of lipoxygenase metabolites from human polymorphonuclear cells. *J Lipid Mediat Cell Signal*, 1994, 9, 285-290.
6. Quiles, M.T.; Arbós, M.A.; Fraga, A.; de Torres, I.M.; Reventós, J.; Morote, J. Antiproliferative and apoptotic effects of the herbal agent *Pygeum africanum* on cultured prostate stromal cells from patients with benign prostatic hyperplasia (BPH). *Prostate* 2010, 70, 1044-1053, doi: 10.1002/pros.21138.
7. Papaioannou, M.; Schleich, S.; Prade, I.; Degen, S.; Roell, D.; Schubert, U.; Tanner, T.; Claessens, F.; Matusch, R.; Baniahmad, A. The natural compound atraric acid is an antagonist of the human androgen receptor inhibiting cellular invasiveness and prostate cancer cell growth. *J Cell Mol Med* 2009, 13, 2210-2223, doi: 10.1111/j.1582-4934.2008.00426.x.
8. Jonler, M.; Riehmman, M.; Brinkmann, R.; Bruskewitz, R.C. Benign prostatic hyperplasia. *Endocrinol Metab Clin North Am* 1994, 23, 795-807.
9. Durak, I.; Biri, H.; Devrim, E.; Sözen, S.; Avci, A. Aqueous extract of *Urtica dioica* makes significant inhibition on adenosine deaminase activity in prostate tissue from patients with prostate cancer. *Cancer Biol Ther* 2004, 3, 855-857, doi: 10.4161/cbt.3.9.1038.
10. Konrad, L.; Müller, H.H.; Lenz, C.; Laubinger, H.; Aumüller, G.; Lichius, J.J. Antiproliferative effect on human prostate cancer cells by a stinging nettle root (*Urtica dioica*) extract. *Planta Med* 2000, 66, 44-47, doi: 10.1055/s-2000-11117.
11. Chung, L.W.; Matsuura, J.; Rocco, A.K.; Thompson, T.C.; Miller, G.J.; Runner, M.N. Tissue interactions and prostatic growth: a new mouse model for prostatic hyperplasia. *Ann N Y Acad Sci*, 1984, 438, 394-404, doi: 10.1111/j.1749-6632.1984.tb38301.x.
12. Kimura, M.; Kimura, I.; Nakase, K.; Sonobe, T.; Mori, N. Micturition activity of pollen extract: contractile effects on bladder and inhibitory effects on urethral smooth muscle of mouse and pig. *Planta Med* 1986, 2, 148-51, doi: 10.1055/s-2007-969102.
13. Yasumoto, R.; Kawanishi, H.; Tsujino, T.; Tsujita, M.; Nishisaka, N.; Horii, A.; Kishimoto, T. Clinical evaluation of long-term treatment using cernitin pollen extract in patients with benign prostatic hyperplasia. *Clin Ther* 1995, 17, 82-87, doi: 10.1016/0149-2918(95)80009-3.
14. Rugendorff, E.W.; Weidner, W.; Ebeling, L.; Buck, A.C. Results of treatment with pollen extract (Cernilton N) in chronic prostatitis and prostatodynia. *Br J Urol* 1993, 71, 433-8, doi: 10.1111/j.1464-410x.1993.tb15988.x.
